**Table S3. Frequency/probability distribution of the net charge in the flanking sequences of the positive and negative NESs and the calculated likelihood ratios.**

| Net charge<br><sup>a</sup> | Positive NESs <sup>b</sup> |       | Negative NESs <sup>c</sup> |       | Negative NESs <sup>d</sup> |       | Likelihood<br>ratio-1 <sup>e</sup> | Likelihood<br>ratio-2 <sup>f</sup> |
|----------------------------|----------------------------|-------|----------------------------|-------|----------------------------|-------|------------------------------------|------------------------------------|
|                            | Freq                       | Prob1 | Freq                       | Prob2 | Freq                       | Prob3 |                                    |                                    |
| ≤-4                        | 26                         | 0.15  | 102                        | 0.08  | 145                        | 0.07  | 1.80                               | 2.09                               |
| -3.9 to -2                 | 29                         | 0.16  | 179                        | 0.14  | 361                        | 0.17  | 1.15                               | 0.94                               |
| -1.9 to 0                  | 55                         | 0.31  | 351                        | 0.28  | 683                        | 0.33  | 1.11                               | 0.94                               |
| ≥0.1                       | 68                         | 0.38  | 627                        | 0.50  | 889                        | 0.43  | 0.77                               | 0.89                               |

<sup>a</sup> Range of amino acid net charge (NC) in the flanking sequences of the positive or negative NESs. The frequency (Freq) and probability (Prob1-Prob3: rate of frequency) for each range were calculated.

<sup>b</sup> Positive NES set consisting of 178 NESs from the ValidNES dataset.

<sup>c</sup> Negative NES set consisting of 1,259 NESs from the ValidNES dataset.

<sup>d</sup> Negative NES set consisting of 2,078 NESs from the Sp-protein dataset.

<sup>e</sup> Likelihood ratio-1: ratio of Prob1 of the positive NESs to Prob2 of the negative NESs from the ValidNES dataset.

<sup>f</sup> Likelihood ratio-1: ratio of Prob1 of the positive NESs to Prob3 of the negative NESs from the Sp-protein dataset.
