**Table S7. NES prediction for 500 budding yeast proteins.**

| Prediction method       | Number of NESs predicted | Percentage of proteins containing predicted NESs |
|-------------------------|--------------------------|--------------------------------------------------|
| Traditional consensus   | 2,941                    | 93                                               |
| Improved consensus      | 4,039                    | 96                                               |
| Wregex <sup>a</sup>     | 5,268                    | 98                                               |
| NESsential <sup>b</sup> | 2,985                    | 96                                               |
| NESmapper <sup>c</sup>  | 801                      | 69                                               |

The input 500 proteins were randomly selected from the *Saccharomyces cerevisiae* protein database.

<sup>a</sup> Prediction with relaxed PSSM configuration.

<sup>b</sup> NESs with the probability values of  $\geq 0.1$  selected.

<sup>c</sup> Prediction with optimized NES profiles. NESs with a score of  $\geq 4$  were selected.
