**Table S8. Running time of NESmapper and NESsential.**

| Tools                   |                   | Running time |
|-------------------------|-------------------|--------------|
| NESmapper               |                   | 8 seconds    |
| NESsential <sup>a</sup> | 1st step (SABLE)  | 301 minutes  |
|                         | 2nd step (POODLE) | 102 minutes  |
|                         | Total             | 403 minutes  |

The dataset used contains 200 proteins with each 800 amino acids.

<sup>a</sup> NESsential has two steps of the sequential processes, accompanying the implementation of SABLE and POODLE-L.
