# Supplementary material for: NESmapper: Accurate Prediction of Leucine-Rich Nuclear Export Signals Using Activity-Based Profiles
Source: PLOS journal article supplement (doi:10.1371/journal.pcbi.1003841), 2014-09-18
Supplement: S7 (10.1371/journal.pcbi.1003841.s007) [file journal.pcbi.1003841.s007]

**Table S4. Improvement of the prediction performance of NESmapper by incorporating the properties of the amino acids composing the NES-flanking sequences.**

| Flanking property | NESmapper threshold score | ValidNES data <sup>a</sup>    |                 | Sp-protein data <sup>b</sup> |
|-------------------|---------------------------|-------------------------------|-----------------|------------------------------|
|                   |                           | False negatives (Sensitivity) | False positives | False positives              |
| –                 | 1                         | 44 (0.785)                    | 1,033           | 2,059                        |
| +                 |                           | 47 (0.771)                    | 970             | 1,931                        |
| –                 | 2                         | 53 (0.742)                    | 788             | 1,655                        |
| +                 |                           | 51 (0.751)                    | 850             | 1,646                        |
| –                 | 3                         | 63 (0.693)                    | 618             | 1,298                        |
| +                 |                           | 55 (0.752)                    | 738             | 1,383                        |

<sup>a</sup> ValidNES dataset consisting of proteins containing 205 LMB-sensitive NESs.

<sup>b</sup> Sp-protein dataset consisting of 484 proteins from *S. pombe* whose subcellular localizations are not affected by LMB-treatment.

The prediction was performed with the untrained NES profiles.
